# Supplementary material for: Cationic BODIPY Photosensitizers for Mitochondrion-Targeted Fluorescence Cell-Imaging and Photodynamic Therapy
Source: MDPI journal article supplement (doi:10.3390/pharmaceutics15051512), 2023-05-16
Supplement: s1 [file s1]

# Cationic BODIPY Photosensitizers for Mitochondrion-Targeted Fluorescence Cell-Imaging and Photodynamic Therapy

Isabel Wen Badon <sup>1,2,†</sup>, Jun-Pil Jee <sup>3,†</sup>, Temmy Pegarro Vales <sup>4,5</sup>, Chanwoo Kim <sup>6</sup>, Seungbin Lee <sup>6</sup>, Jaesung Yang <sup>6,\*</sup>, Si Kyung Yang <sup>7,\*</sup> and Ho-Joong Kim <sup>1,\*</sup>

<sup>1</sup> Department of Chemistry, Chosun University, Gwangju 61452, Republic of Korea; istbadon@gmail.com

<sup>2</sup> Department of Life Sciences, Chung-Ang University, Seoul 06974, Republic of Korea

<sup>3</sup> Drug Delivery Research Lab, College of Pharmacy, Chosun University, Gwangju 61452, Republic of Korea; jee@chosun.ac.kr

<sup>4</sup> Department of Chemistry, Caraga State University, Butuan City 8600, Philippines; valestemmy@gmail.com

<sup>5</sup> Mineral Resources Management Research and Training Center, Caraga State University, Butuan City 8600, Philippines

<sup>6</sup> Department of Chemistry, Yonsei University, Wonju 26493, Republic of Korea; chanwoo.kim@yonsei.ac.kr (C.K.); dltmdqls0503@gmail.com (S.L.)

<sup>7</sup> Department of Chemistry Education, Chonnam National University, Gwangju 61186, Republic of Korea

\* Correspondence: jaesung.yang@yonsei.ac.kr (J.Y.); sky223@jnu.ac.kr (S.K.Y.); hjkim@chosun.ac.kr (H.-J.K.)

† These authors contributed equally to this work.

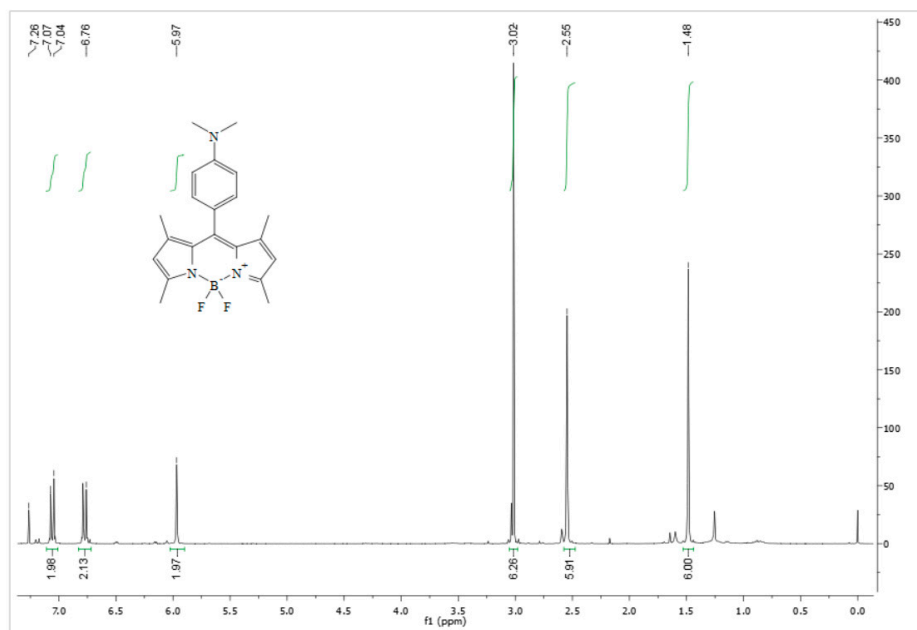

**Figure S1.** <sup>1</sup>H-NMR spectrum of H1.

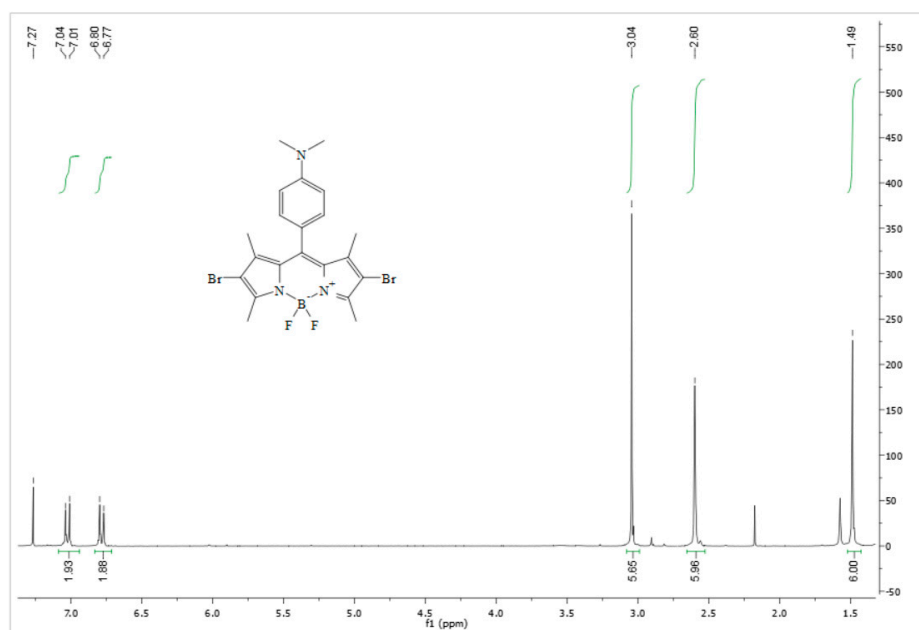

Figure S2. <sup>1</sup>H-NMR spectrum of Br1.

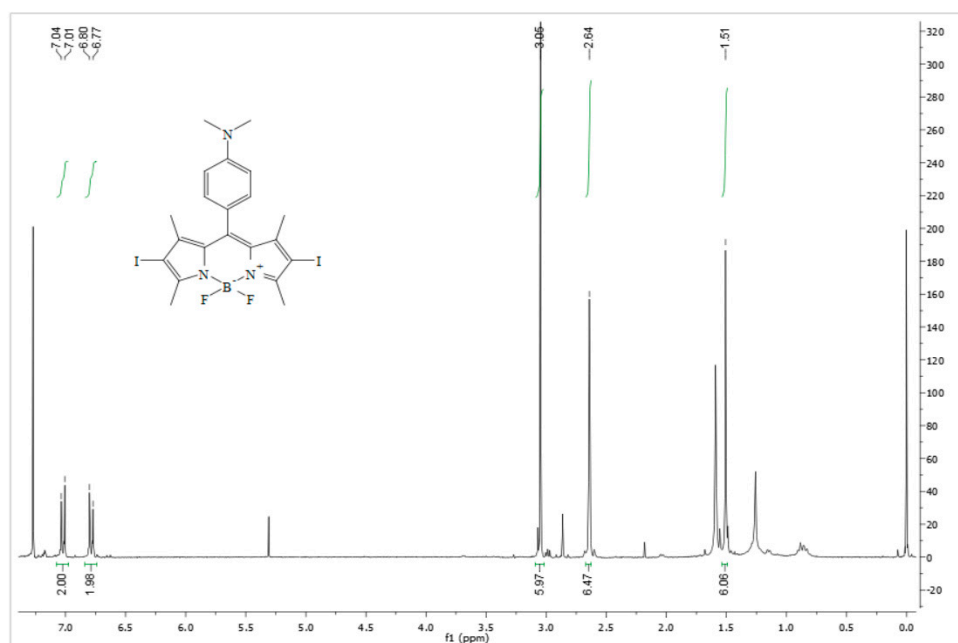

**Figure S3.**  $^1\text{H}$ -NMR spectrum of I1.

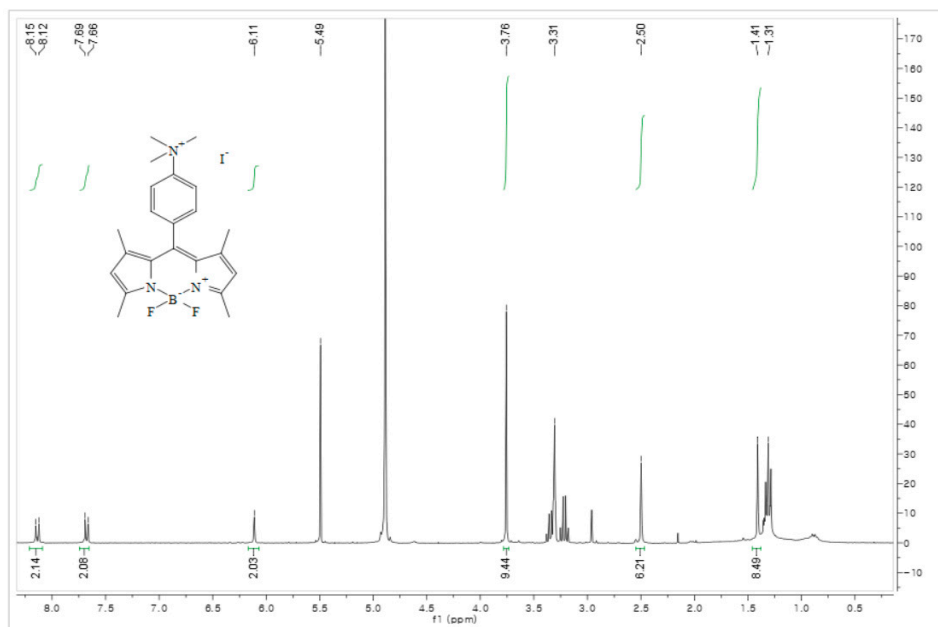

**Figure S4.**  $^1\text{H}$ -NMR spectrum of cationic BODIPY AmH.

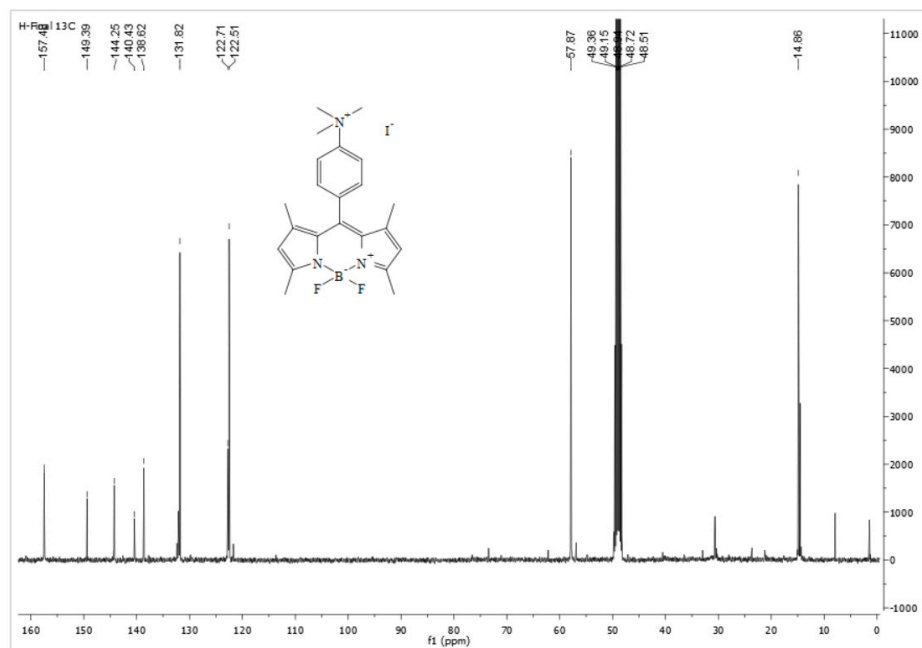

**Figure S5.**  $^{13}\text{C}$ -NMR spectrum of cationic BODIPY AmH.

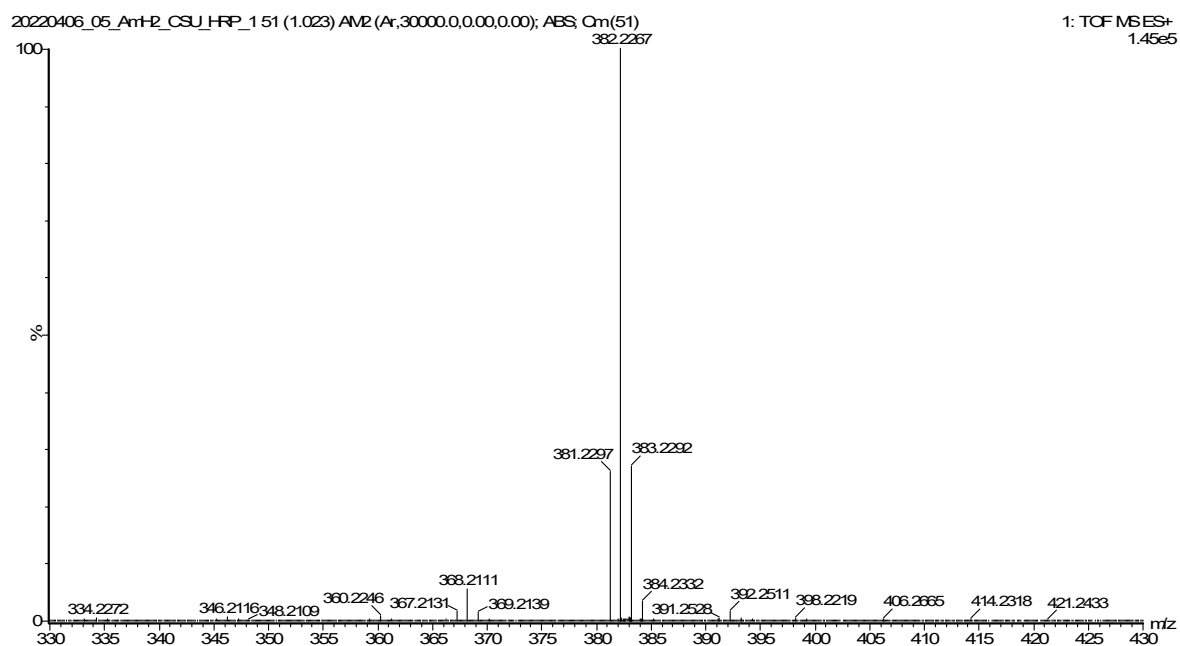

**Figure S6.** HR-ESI mass spectrum of cationic BODIPY AmH.

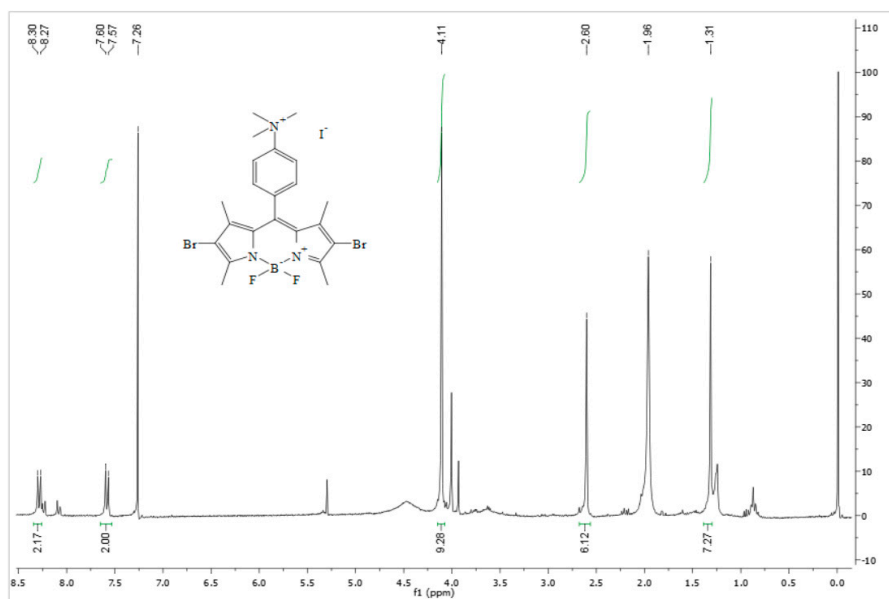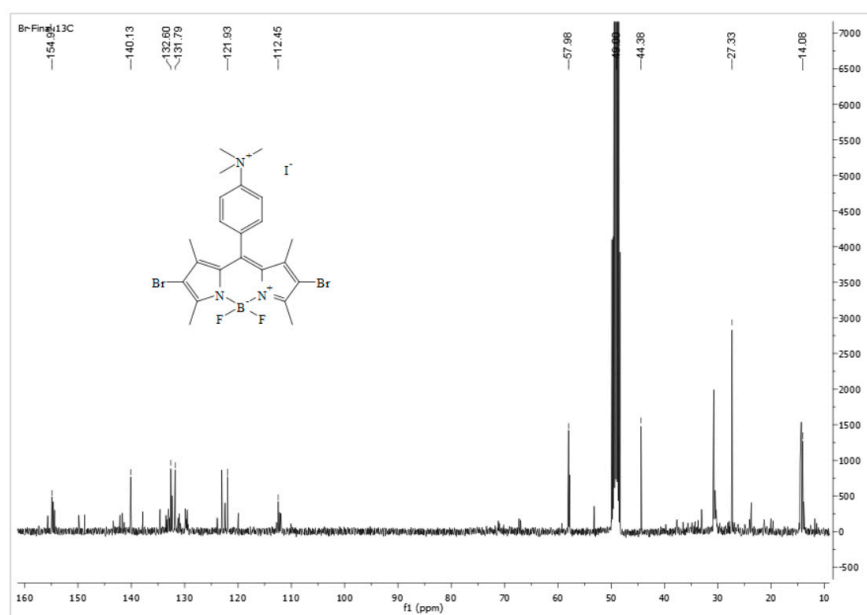

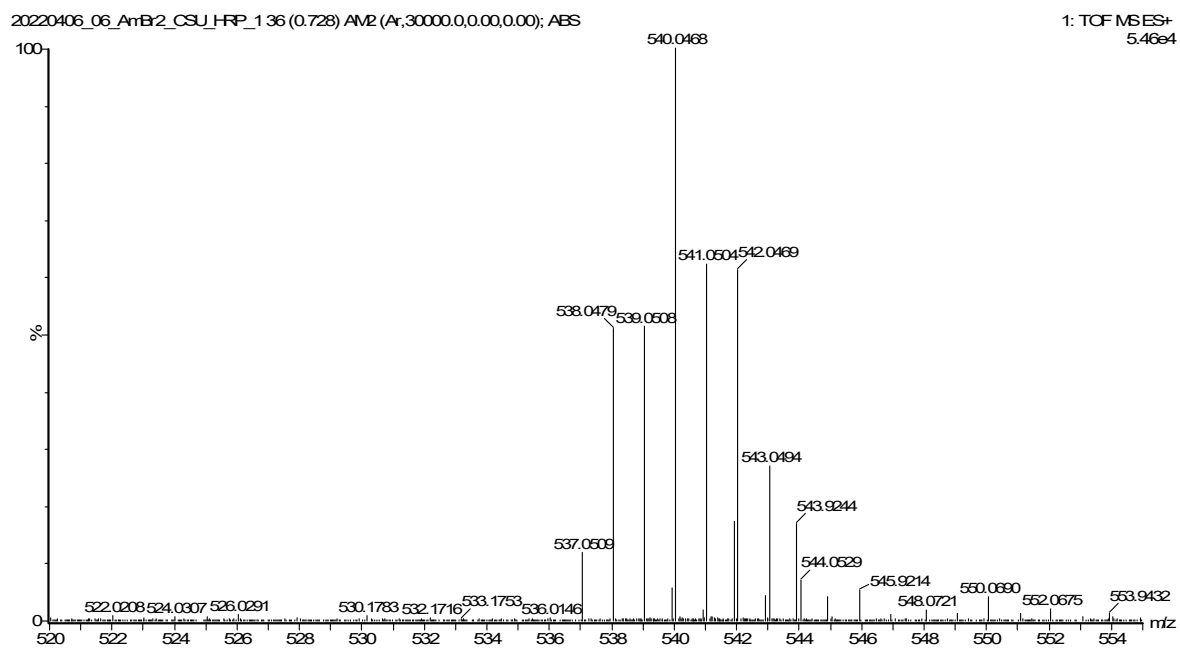

**Figure S9.** HR-ESI mass spectrum of cationic BODIPY AmBr.

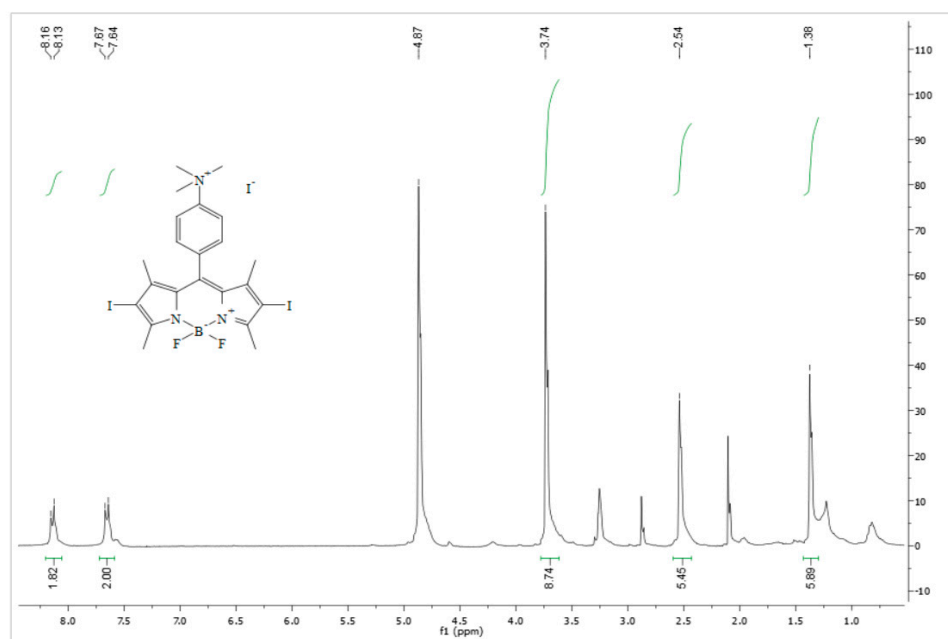

**Figure S10.**  $^1\text{H}$ -NMR spectrum of cationic BODIPY AmI.

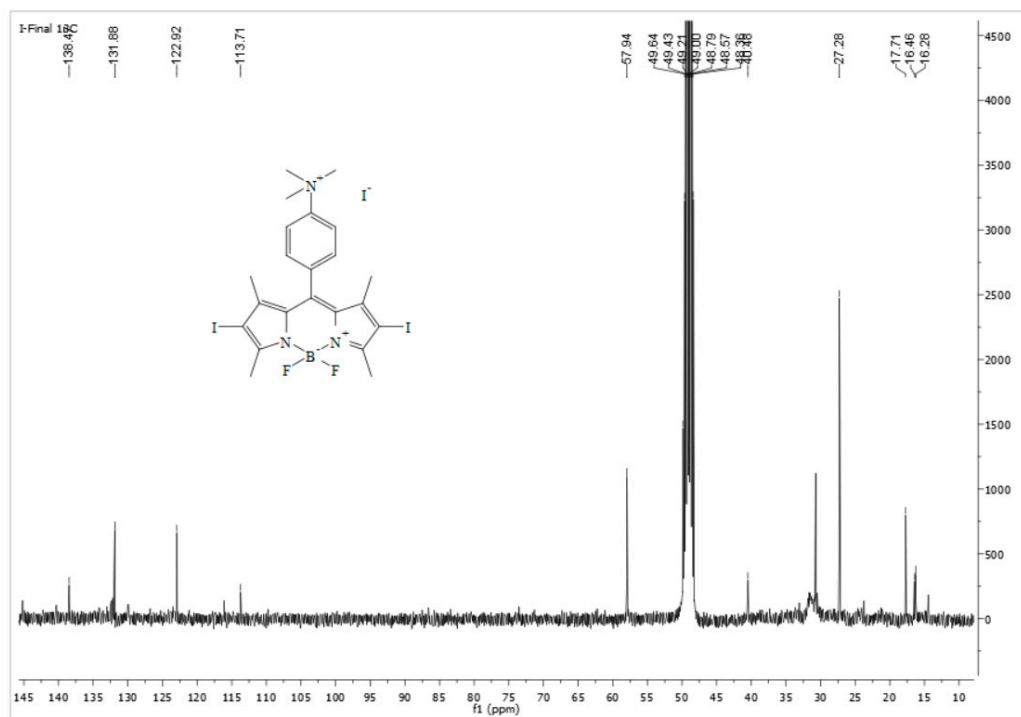

**Figure S11.** <sup>13</sup>C-NMR spectrum of cationic BODIPY AmI.

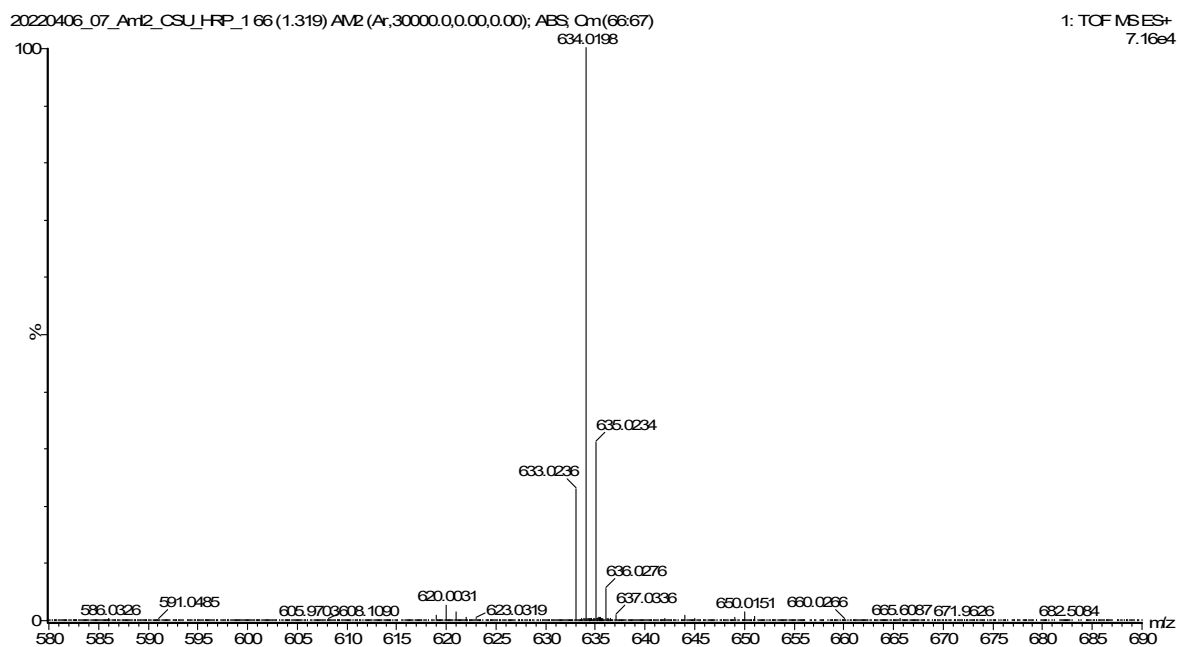

**Figure S12.** HR-ESI mass spectrum of cationic BODIPY AmI.



**Table S1.** Transition energy (E), wavelength ( $\lambda$ ), and oscillator strength (f) for the lowest singlet excited state of BODIPY PSs and the contribution of frontier orbitals to each transition.

|      | State          | E (eV) <sup>a</sup> | $\lambda$ (nm) | $f^b$  | Major contribution to transition                   |
|------|----------------|---------------------|----------------|--------|----------------------------------------------------|
| AmH  | S <sub>1</sub> | 2.92                | 425            | 0.5636 | H $\rightarrow$ L (97%)                            |
| AmBr | S <sub>1</sub> | 2.71                | 458            | 0.5213 | H $\rightarrow$ L (91%), H-1 $\rightarrow$ L (10%) |
| AmI  | S <sub>1</sub> | 2.66                | 466            | 0.4975 | H $\rightarrow$ L (88%), H-1 $\rightarrow$ L (12%) |

<sup>a</sup> Vertical excitation energy computed in water using B3LYP/6-31g(d) for AmH and AmBr. Vertical excitation energy computed in water using B3LYP/LANL2DZ for AmI. <sup>b</sup> Oscillator strength.

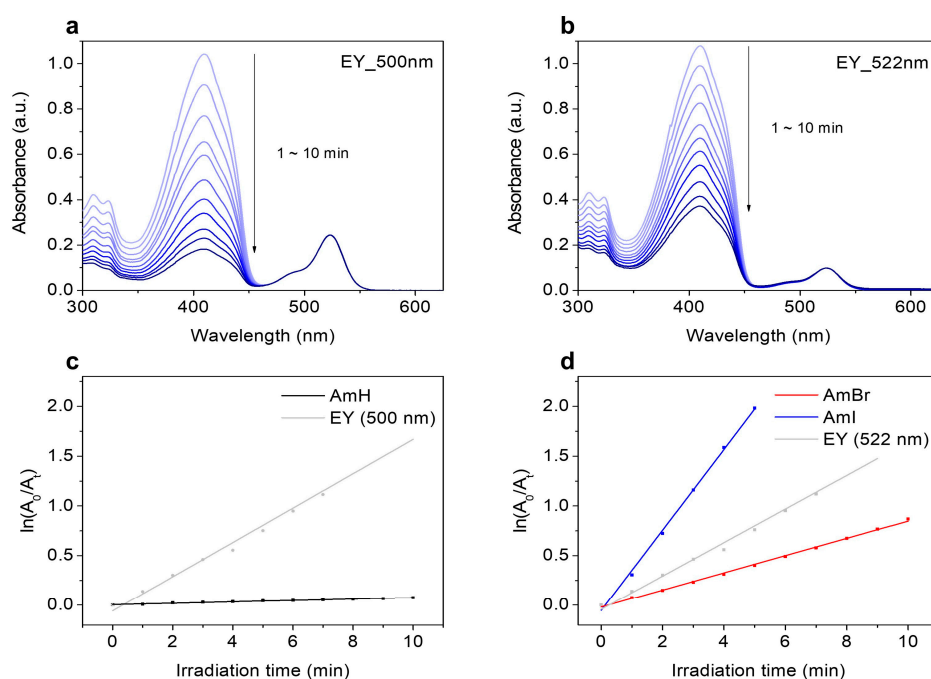

**Figure S13.** (a–b) Time-dependent absorption spectra of air-saturated methanol solution of DPBF containing EY under green LED light irradiation (500 nm and 522 nm, 7 mW cm<sup>-2</sup>). (c–d) Temporal change in the absorbance of DPBF at 410 nm plotted according to the first order kinetics (dots) with linear fits (line) in semilogarithmic scale. Legend: EY : Eosin Y.

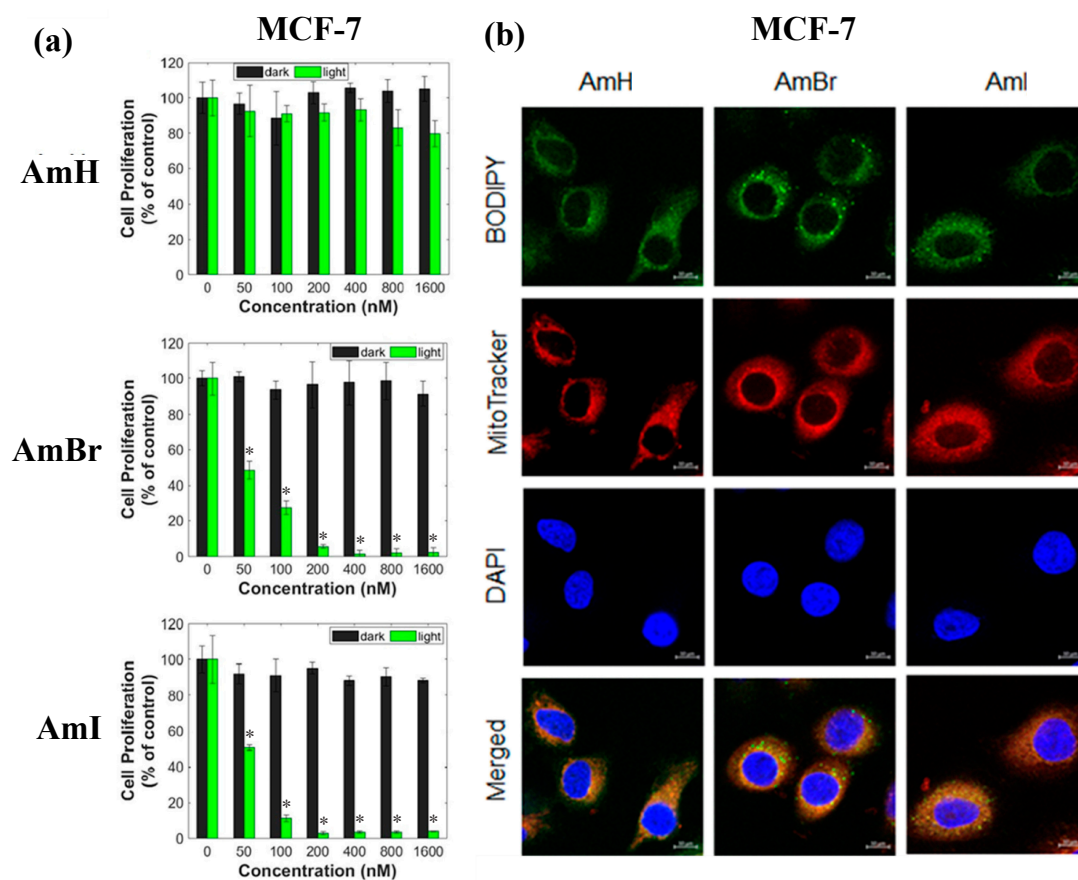

**Figure S14.** (a) Cell proliferation (% of control) of MCF-7 cancer cell lines under dark and light conditions; (b) CLSM images of MCF-7 cell line after a 24-hour incubation with the BODIPY dyes (1.6  $\mu$ M) with MitoTracker Red and DAPI as co-stain.

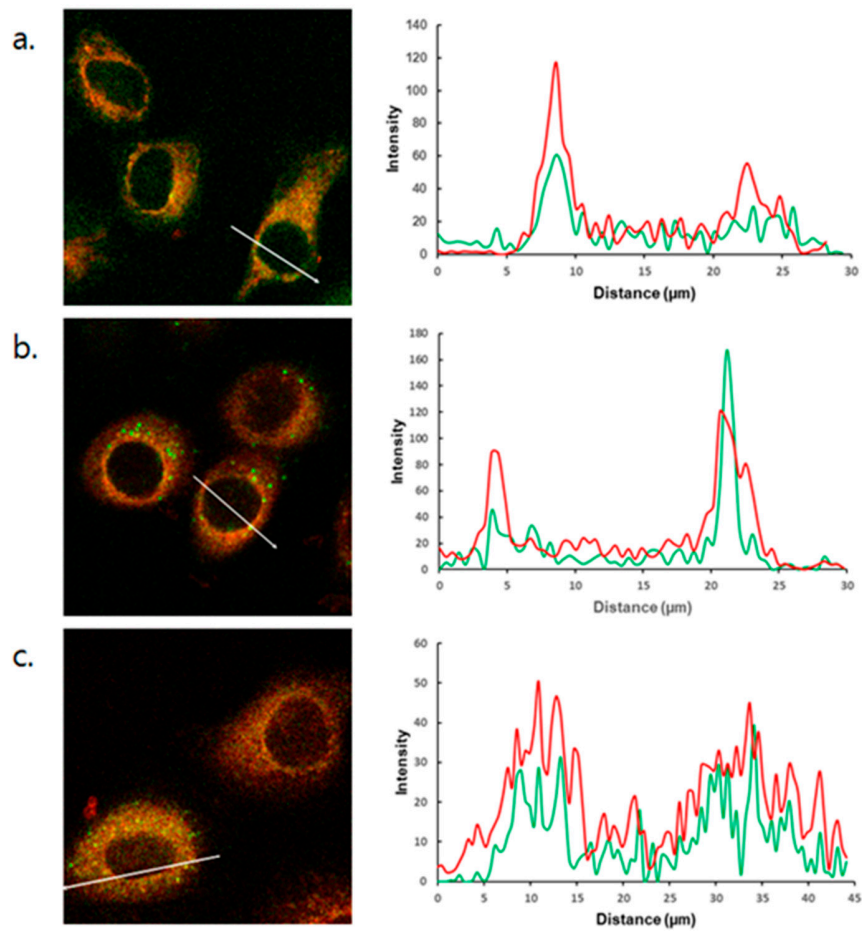

**Figure S15.** Fluorescence micrographs of MCF-7 cells co-stained with MitoTracker Red and their corresponding fluorescence intensity profiles along the region of interest marked by a white arrow for BODIPYs (a) AmH, (b) AmBr, and (c) AmI. The green topographic profile corresponds to each BODIPY dye while the red one is for MitoTracker Red.
